# Supplementary material for: A Small-Plaque Isolate of the Zika Virus with Envelope Domain III Mutations Affect Viral Entry and Replication in Mammalian but Not Mosquito Cells
Source: MDPI journal article supplement (doi:10.3390/v14030480), 2022-02-26
Supplement: s1 [file s1]

## Supplementary Materials

(a) ZIKV-CVD\_06-020

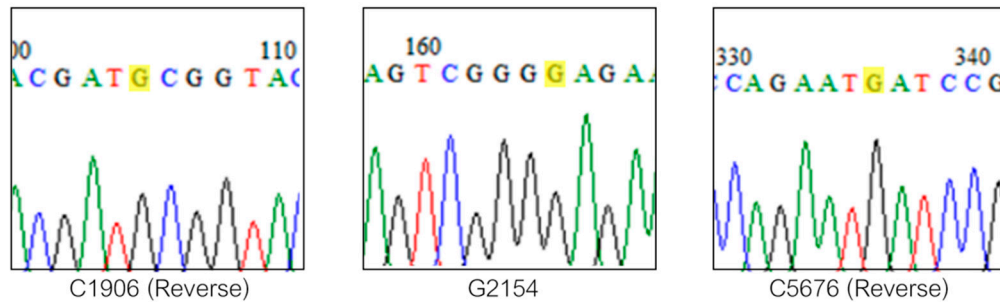

(b) ZIKV-PDK7-B5

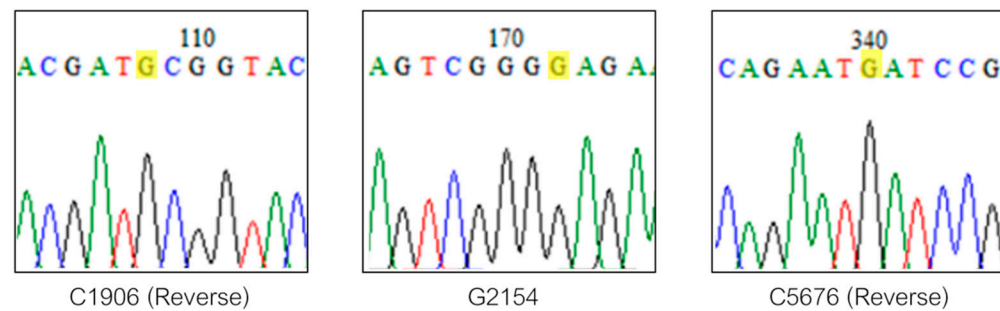

(c) ZIKV-PDK7-S3

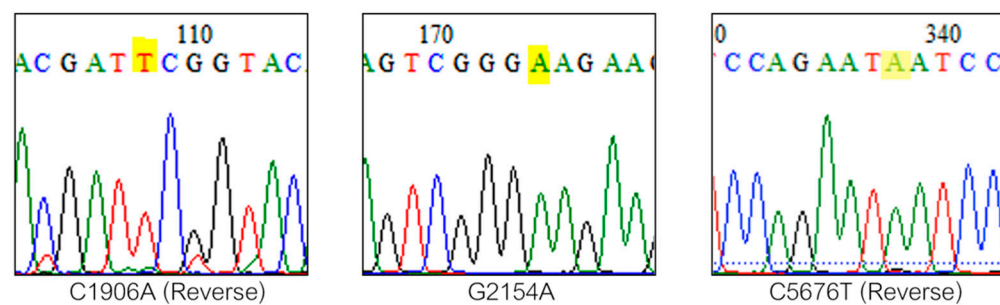

(d) ZIKV-PDK7-S1.4

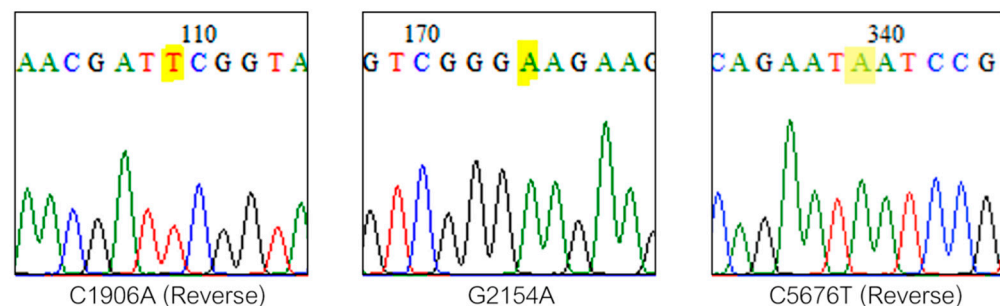

**Figure S1.** Chromatograms of mutations **a)** ZIKV-CVD\_06-020 or wild-type, **b)** ZIKV-PDK7-B5, **c)** ZIKV-PDK7-S3, and **d)** ZIKV-PDK7-S1.4. The nucleotide positions at 1906, 2154, and 5676 represent the mutation points A310E, E393K, in E protein and H355Y in NS3, respectively. “(Reverse)” indicates that a reverse primer was used to read that sequence portion

**Table S1.** Primers for whole genome ZIKV sequencing

| Region    | Primer name  | Primer sequence (5'-3')                     |
|-----------|--------------|---------------------------------------------|
| 5'UTR-E   | ZIKV_F1      | AGTTGTTGATCTGTGTGAATCAGACTGC <sup>1,2</sup> |
|           | ZIKV_R213    | CCATGACCCAGCAGAAAGTCC <sup>1</sup>          |
|           | ZIKV_F774    | TCCACTAGGAAGCTGCAAA <sup>1</sup>            |
|           | ZIKV_F1084   | GAGATGGATGGTGCAAAGGGAAG <sup>1</sup>        |
|           | ZIKV_R1_2040 | CTGGGGTCAGAGTTTGCATG <sup>1,2</sup>         |
| E-NS1     | ZIKV_F2_1957 | CAGTGGAGGTACAGTACGCAGG <sup>1, 2</sup>      |
|           | ZIKV_NS1F    | GATGTGGGGTGCTCGGTGGACT <sup>1</sup>         |
|           | ZIKV_R2_4123 | TTCTTCACACTGCCTTTCCCC <sup>1,2</sup>        |
| NS1-NS3   | ZIKV_F3_3978 | CCACGCACTGACAAYATCACCTTGG <sup>1,2</sup>    |
|           | ZIKV_NS3F    | AGTGGTGCTCTATGGGATGTG <sup>1</sup>          |
|           | ZIKV_R3_6040 | CCACCTCCATACAGATACTCATCTC <sup>1,2</sup>    |
| NS3-NS5   | ZIKV_F4_5942 | TGGACCCATGCCTGTCACAC <sup>1, 2</sup>        |
|           | ZIKV_F5886   | AGATTCCAGGAGATGCCTAAAG <sup>1</sup>         |
|           | ZIKV_NS4AF   | GGAGCGGCTTTTGGAGTGATGG <sup>1</sup>         |
|           | ZIKV_NS4BF   | AATGAACTCGGATGGTTGGAG <sup>1</sup>          |
|           | ZIKV_F7418   | AAAGATGGGACAGGTGCTACTC <sup>1</sup>         |
|           | ZIKV_R4_9037 | CCCATCATGTTGTACACACAGCTC <sup>1,2</sup>     |
| NS5-5'UTR | ZIKV_F5_8800 | CGTAGCAATGCAGCATTAGGGG <sup>1,2</sup>       |
|           | ZIKV_NS5R    | GAAGGGTCTACACCTGGAGTGCTA <sup>1</sup>       |
|           | ZIKV_F10117  | GAGTGTGGATTGAGGAGAACGAC <sup>1</sup>        |
|           | ZIKV_R5      | AGACCCATGGATTCCCCAC <sup>1,2,3</sup>        |

<sup>1</sup> Primers for sequencing<sup>2</sup> Primers for both amplification and sequencing of each fragment<sup>3</sup> Primer for cDNA synthesis

**Table S2.** Primers and probes for real-time PCR

|              | Detection         | Primer and probe   | Primer and probe sequences (5'-3')     |
|--------------|-------------------|--------------------|----------------------------------------|
| Virus        | Zika envelope     | ZIKV_BonE_F*       | AGYCGYTGYCCAACACAAG                    |
|              |                   | ZIKV_BonE_R*       | CACCARRCTCCCYTTGCCA                    |
|              |                   | ZIKV_BonE probe*   | FAM-CCTMCCTYGAYAAGCARTCAGACACYCAA-BHQ1 |
| Housekeeping | 40SRibosomal      | RPS17_F**          | ACATCTGATGAAGCGCCTGC                   |
|              | Protein S17       | RPS17_R**          | ACACTTCCGGCACGTAGTTGT                  |
|              | <i>A. aegypti</i> | RPS17_probe**      | JOE-CACTCCCAGGTCCGTGGTATCTCCATC-BHQ1   |
|              | MusM_18srR        | MusM_18srRNA_F     | GTAACCCCGT TGAACCCCAT                  |
|              | NA                | MusM_18srRNA_R     | CCATCCAATCGGTAGTAGCG                   |
|              |                   | MusM_18srRNA_probe | JOE-TCCCAGTAAGTGCGGGTCATAAGC-BHQ1      |

\*Corman VM, Rasche A, Baronti C, et al. Assay optimization for molecular detection of Zika virus. Bull World Health Organ. 2016;94(12):880-892. doi:10.2471/BLT.16.175950

\*\*Cox J, Brown HE, Rico-Hesse R. Variation in vector competence for dengue viruses does not depend on mosquito midgut binding affinity. PLoS Negl Trop Dis. 2011;5(5):e1172. doi:10.1371/journal.pntd.0001172

**Table S3.** Energy and vibrational entropy changes

| Region   | Mutations <sup>1</sup> | $\Delta\Delta G$ (kcal.mol <sup>-1</sup> .K <sup>-1</sup> ) <sup>2</sup> | $\Delta\Delta S_{Vib}$ (kcal.mol <sup>-1</sup> .K <sup>-1</sup> ) <sup>3</sup> |
|----------|------------------------|--------------------------------------------------------------------------|--------------------------------------------------------------------------------|
| Envelope | A310E                  | 1.861                                                                    | -2.326                                                                         |
|          | E393K                  | 1.629                                                                    | -2.036                                                                         |
| NS3      | H355Y                  | -0.059                                                                   | 0.073                                                                          |

<sup>1</sup> Mutations of small-plaque isolates

<sup>2</sup> Energy changing between wild-type and mutation

<sup>3</sup> Vibrational Entropy Energy changing between wild-type and mutation
